# Supplementary material
Source: PubMed Central journal article supplement (PMC3646899)
Supplement: NIHMS446846-supplement-02.pdf [file NIHMS446846-supplement-02.pdf]

# ECG of pre-operation

# ECG of post-operation

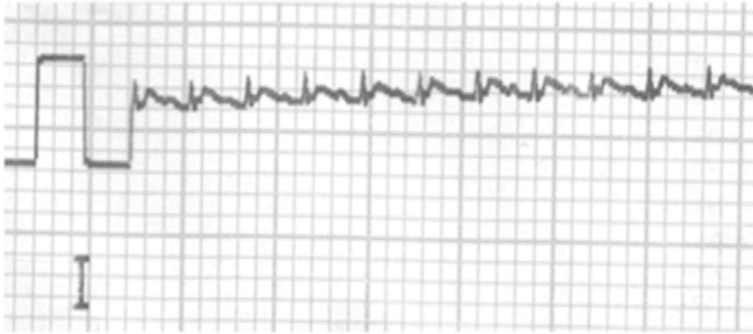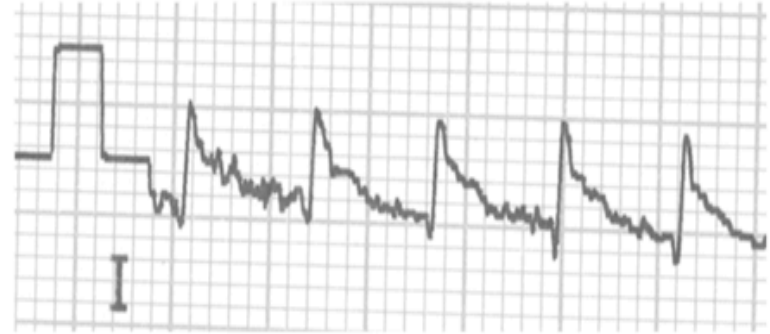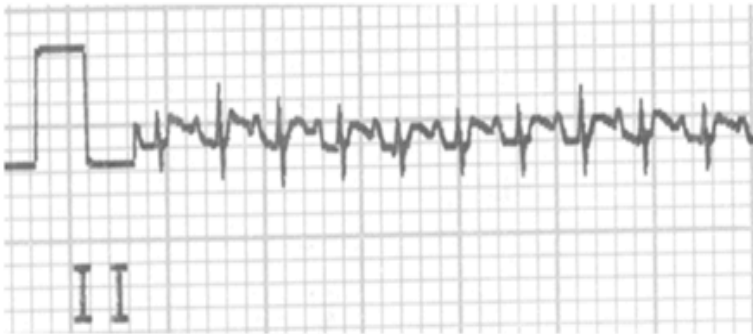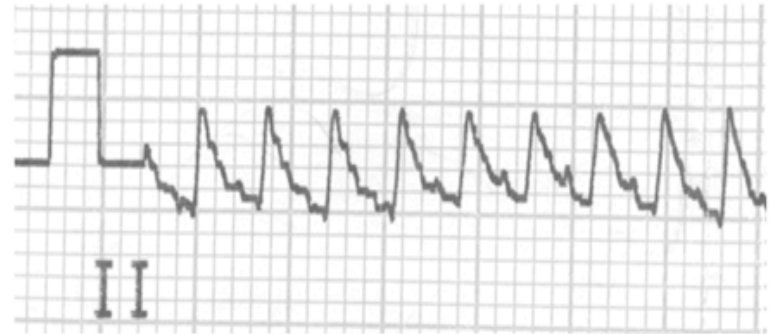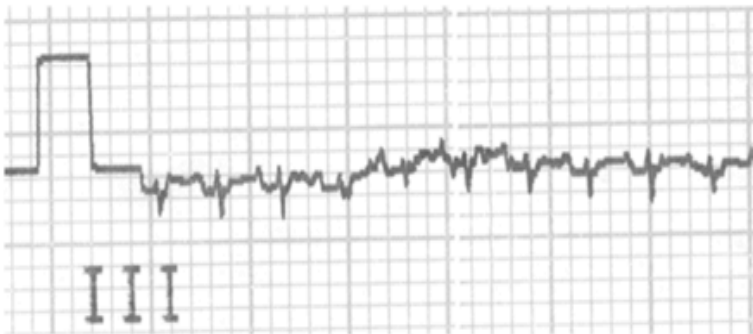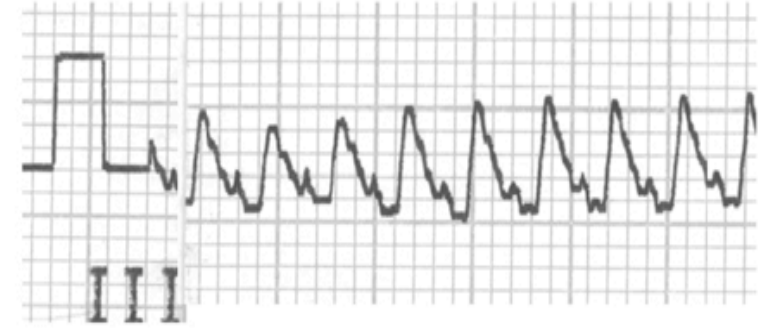

Online Figure 1. ECG prior to and after ligation of the left anterior descending coronary artery, the latter showing ST elevation as evidence of myocardial injury
